# Supplementary material for: Linezolid-resistant enterococci in Polish hospitals: species, clonality and determinants of linezolid resistance
Source: Springer Nature journal article supplement (doi:10.1007/s10096-017-2934-7), 2017-02-14

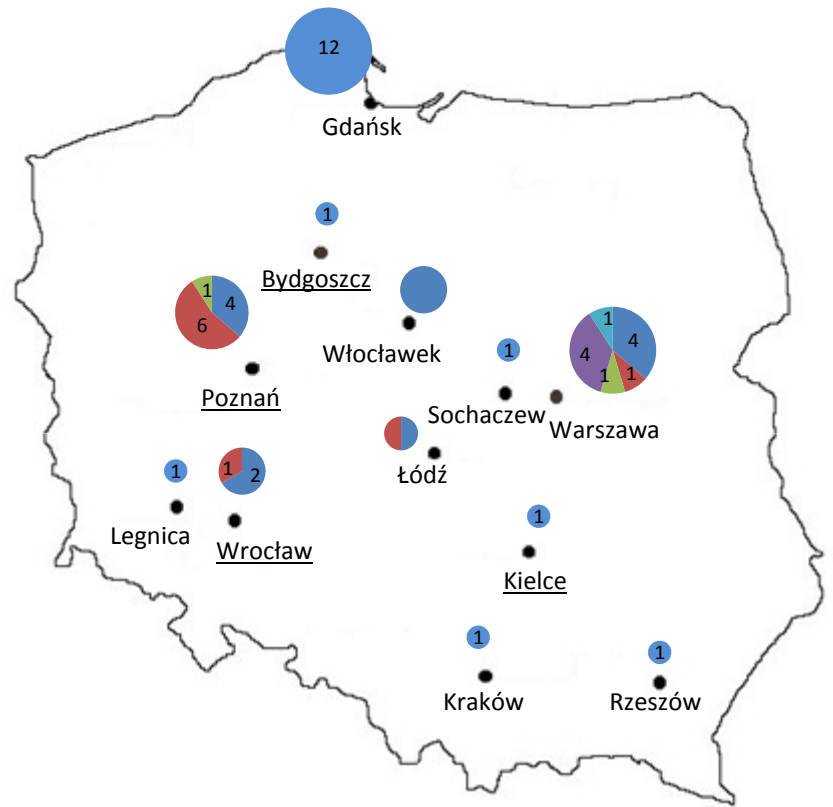

Supplement: MOESM1 [file 12065520]
